RESEARCH ARTICLE

# Prevalence and risk factors of strabismus in children and adolescents in South Korea: Korea National Health and Nutrition Examination Survey, 2008–2011

Kyung Eun Han<sup>1</sup>, Seung-Hee Baek<sup>2</sup>, Seung-Hyun Kim<sup>3</sup>, Key Hwan Lim<sup>1\*</sup>, Epidemiologic Survey Committee of the Korean Ophthalmological Society<sup>¶</sup>

**1** Department of Ophthalmology, Ewha Womans University College of Medicine, Mok-dong Hospital, Seoul, South Korea, **2** Department of Ophthalmology, Kim's Eye Hospital, Konyang University College of Medicine, Seoul, South Korea, **3** Department of Ophthalmology, Korea University College of Medicine, Seoul, South Korea

¶ Membership of the Epidemiologic Survey Committee of the Korean Ophthalmological Society is listed in Acknowledgments.

\* [limkh@ewha.ac.kr](mailto:limkh@ewha.ac.kr)

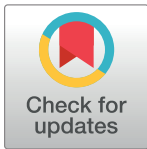

**OPEN ACCESS**

**Citation:** Han KE, Baek S-H, Kim S-H, Lim KH, Epidemiologic Survey Committee of the Korean Ophthalmological Society (2018) Prevalence and risk factors of strabismus in children and adolescents in South Korea: Korea National Health and Nutrition Examination Survey, 2008–2011. PLoS ONE 13(2): e0191857. <https://doi.org/10.1371/journal.pone.0191857>

**Editor:** Annegret Dahlmann-Noor, Moorfields Eye Hospital NHS Foundation Trust, UNITED KINGDOM

**Received:** March 9, 2017

**Accepted:** January 5, 2018

**Published:** February 14, 2018

**Copyright:** © 2018 Han et al. This is an open access article distributed under the terms of the [Creative Commons Attribution License](https://creativecommons.org/licenses/by/4.0/), which permits unrestricted use, distribution, and reproduction in any medium, provided the original author and source are credited.

**Data Availability Statement:** Survey data are publicly available online from the Korea Centers for Disease Control and Prevention ([https://knhanes.cdc.go.kr/knhanes/sub03/sub03\\_02\\_02.do](https://knhanes.cdc.go.kr/knhanes/sub03/sub03_02_02.do)).

**Funding:** The authors received no specific funding for this work.

**Competing interests:** The authors have declared that no competing interests exist.

## Abstract

### Purpose

To evaluate the prevalence and risk factors associated with horizontal strabismus in children and adolescents in South Korea.

### Methods

A total of 5,935 children and adolescents 5–18 years of age who participated in the fourth and fifth Korean National Health and Nutrition Examination Survey (KNHANES IV-V) from July 2008 to December 2011 were evaluated and the prevalence of horizontal strabismus was estimated. Univariate and multivariate logistic regression analyses were conducted to determine the association between demographic, socioeconomic and clinical risk factors and clinically significant exodeviation ( $\geq 15$  prism diopters [PD]) and esodeviation ( $\geq 10$  PD).

### Results

Among 5,935 eligible subjects, 84 subjects had clinically significant exodeviation and 13 had clinically significant esodeviation. The overall prevalence of clinically significant horizontal strabismus was 1.6% (95% confidence interval [CI], 1.2–2.1): 1.3% (95% CI, 1.0–1.7) for clinically significant exodeviation and 0.3% (95% CI, 0.1–0.6) for clinically significant esodeviation. Clinically significant exodeviation was associated with amblyopia (adjusted odds ratio [aOR], 6.45; 95% CI, 2.14–19.44), family history of strabismus (aOR, 4.91; 95% CI, 1.71–14.08) and astigmatism  $\geq 1.0$  D (aOR, 1.84; 95% CI, 1.13–2.98). Clinically significant esodeviation was associated with hyperopia (aOR, 12.16; 95% CI, 1.31–113.04) and amblyopia (aOR, 4.70; 95% CI, 1.12–19.81). Other demographic, socioeconomic, and clinical variables were not associated with strabismus.

## Conclusion

This study provides data on the prevalence and independent risk factors for clinically significant exodeviation and esodeviation in a representative population of children and adolescents in South Korea.

## Introduction

Strabismus is a common ocular disorder in children; the prevalence of strabismus ranges from 0.8% to 5.65% [1–9]. Significant strabismus left untreated can result in decreased binocularity and amblyopia, and could eventually lead to psychosocial problems, including low self-confidence, depressive mood disorder, reduced inter-personal relationships, and reduced employment [10–14].

The cause of strabismus is not well established. Various factors have been postulated to be associated with strabismus: ocular factors such as hyperopia, myopia, astigmatism, anisometropia, and amblyopia, family history of strabismus and amblyopia, maternal factors such as smoking or alcohol use during pregnancy, and perinatal factors such as intrauterine growth retardation, prematurity, and low birth weight [1–3, 15–18]. Among the ocular factors, hyperopia and esotropia are highly associated [2, 3, 16, 19]. Hyperopia gradually decreases during school-age years [20, 21]; however, most population-based studies evaluating associations between potential risk factors and strabismus have been conducted only in children aged 7 years or less (Table 1) [1–3, 15, 16]. The prevalence of myopia in children and adolescents in South Korea ranges from 50% in aged 5–11 years to 78.8% in aged 12–18 years [22], which is higher than that in China (16.2% in aged 5–15 years) [23] and that in Japan (43.5% at 12-year-old and 66.0% at 17-year-old) [20]. The exodeviation:esodeviation ratio was 3:1 in aged 3–5 years children in South Korea [24], which was lower than that in China (4:1 in aged 5–15-year-old) [4] and similar with that in Japan (2.8:1 in aged 6–13 years) [25]. Ethnicity may influence the prevalence of strabismus and exodeviation:esodeviation ratio, however, the relationship between possible risk factors and strabismus in South Korean has not been evaluated. Therefore, we evaluated strabismus prevalence and identified associations between demographic, socioeconomic, and clinical risk factors for strabismus in South Korean children and adolescents.

## Methods

### Study population

The Division of Chronic Disease Surveillance, Korea Centers for Disease Control and Prevention, Ministry of Health and Welfare regularly conduct a nationwide, population-based, cross-sectional health examination and survey, the Korea National Health and Nutrition Examination Survey (KNHANES), to evaluate the general health and nutritional status of South Koreans. KNHANES consists of 3 parts, a health interview survey, a health examination survey, and a nutrition survey. The health interview data were collected *via* household interviews and health examination data were collected in a specially-equipped mobile examination center. To represent the South Korean population, this survey had a stratified, multistage probability sampling design based on National Census Data. Additional details of the KNHANES design and methods have been described previously [22].

KNHANES data were collected in 1998 (I), 2000 (II), 2005 (III), 2007–2009 (IV), 2010–2012 (V), and 2013–2015 (VI). From July 2008 to December 2011, KNHANES included an

**Table 1. Review of population-based studies of risk factors associated with esodeviation and exodeviation in children.**

|                                | Whole population<br>Exodeviation, n (%)<br>Esodeviation, n (%)       | Age (years) | Associations between variables and exodeviation                                                                                                                                                                                                                                                                                                                                                                                                                              | Associations between factors and esodeviation                                                                                                                                                                                                                                                                                                                                                                         |
|--------------------------------|----------------------------------------------------------------------|-------------|------------------------------------------------------------------------------------------------------------------------------------------------------------------------------------------------------------------------------------------------------------------------------------------------------------------------------------------------------------------------------------------------------------------------------------------------------------------------------|-----------------------------------------------------------------------------------------------------------------------------------------------------------------------------------------------------------------------------------------------------------------------------------------------------------------------------------------------------------------------------------------------------------------------|
| SMS* (Australia) 2006 [2]      | 1,740<br>14 (0.8%) with exotropia<br>26 (1.5%) with esotropia        | 6           | Myopia $\leq -0.5$ D, hyperopia $\geq +3.0$ D, astigmatism $\geq 1$ D, anisometropia $\geq 1$ D, and amblyopia (all $p < 0.05$ )                                                                                                                                                                                                                                                                                                                                             |                                                                                                                                                                                                                                                                                                                                                                                                                       |
| ALSPAC (UK) 2008 [1]           | 7,825<br>45 (0.6%) with exodeviation<br>211 (2.8%) with esodeviation | 7           | -                                                                                                                                                                                                                                                                                                                                                                                                                                                                            | Family history of strabismus and amblyopia<br>OR 2.39 (95% CI 1.27–3.20)<br>Parental hypermetropia<br>OR 1.62 (95% CI 1.09–2.44)                                                                                                                                                                                                                                                                                      |
| MEPEDS & BPEDS (USA) 2011 [16] | 9,970<br>102 (1.0%) with exotropia<br>102 (1.0%) with esotropia      | 0.5–6       | Female sex<br>OR 1.62 (95% CI 1.08–2.42)<br>Astigmatism<br>1.5–<2.5 D and $\geq 2.5$ D compared to <0.5 D: OR 2.49 and 5.88, respectively (95% CI 1.30–4.79 and 2.76–12.54, respectively)<br>J0 anisometropia<br>0.25–<0.5 D and $\geq 0.5$ D compared to <0.25 D: OR 2.01 and 2.63, respectively (95% CI 1.25–3.22 and 1.26–5.49, respectively)                                                                                                                             | Hyperopia<br>2–<3 D, 3–<4 D, 4–<5 D, and $\geq 5$ D compared to 0–<1 D: OR 6.38, 23.06, 59.81 and 122.24, respectively (95% CI 2.56–15.93, 9.56–55.61, 23.06–151.52, and 49.86–299.70, respectively)<br>Child age<br>48–59 months and 60–72 months compared to 6–11 months: OR 7.94 and 9.40, respectively (95% CI 1.85–34.03 and 2.20–40.10, respectively)<br>Anisometropia $\geq 1$ D<br>OR 2.03 (95% CI 1.10–3.73) |
| STARS* (Singapore) 2013 [15]   | 2,992<br>20 (0.7%) with exotropia<br>3 (0.1%) with esotropia         | 0.5–6       | Sibling with strabismus: OR 41.20 (95% CI 9.03–188.00)<br>Astigmatism $\geq 1.0$ D: OR 4.19 (95% CI 1.20–14.65)<br>Amblyopia: OR 12.85 (95% CI 2.32–71.27)<br>Paternal education tertiary and secondary compared to those with none/primary school: OR 0.25 and 0.12, respectively, (95% CI 0.07–0.96 and 0.02–0.77, respectively)                                                                                                                                           |                                                                                                                                                                                                                                                                                                                                                                                                                       |
| NPVP (China) 2015 [3]          | 5,831<br>270 (4.6%) with exotropia<br>45 (0.8%) with esotropia       | 3–6         | Myopia<br>-1–<0 D and <-1 D compared to 0–<1 D: OR 40.54 and 18.93, respectively (95% CI 13.16–124.86 and 5.25–68.22, respectively)<br>Hyperopia<br>1–<2 D, 2–<3 D, 3–<4 D and 4–<5 D compared to 0–<1 D: OR 67.78, 23.13, 25.57 and 8.36, respectively (95% CI 40.80–112.60, 12.70–42.13, 9.97–65.59 and 1.71–40.97, respectively)<br>Astigmatism<br>0.5–<1.0 D and <0 D compared to 0–0.5 D: OR 3.56 and 1.90, respectively (95% CI 1.51–8.40 and 1.17–3.10, respectively) | Hyperopia<br>2–<3 D, 3–<4 D, 4–<5 D and $\geq 5$ D compared to 0–<1 D: OR 9.30, 9.28, 14.57 and 180.82, respectively (95% CI 2.63–32.96, 1.48–58.13, 2.32–91.65, and 36.37–898.89, respectively)<br>Anisometropia<br>0.5–<1 D and $\geq 1$ D compared to <0.5 D: OR 3.15 and 7.41, respectively (95% CI 1.07–9.29 and 2.50–21.93, respectively)                                                                       |

SMS = Sydney Myopia Study, ALSPAC = Avon Longitudinal Study of Parents and Children, MEPEDS = Multi-Ethnic Pediatric Eye Disease Study, STARS = Strabismus, Amblyopia and Refractive Error in Singaporean Preschoolers Study, NPVP = Nanjing Pediatric Vision Project  
D = diopters, PD = prism diopters, OR = odds ratio, CI = confidence interval, J0 = power in the vertical or horizontal meridian  
\* Separate association analyses of esodeviation and exodeviation were not reported.

<https://doi.org/10.1371/journal.pone.0191857.t001>

ophthalmologic survey and examination for subjects aged 3 years or older. Ocular alignment assessment was performed on all subjects, but visual acuity (VA) assessment and refraction using an autorefractor were performed on subjects aged 5 years or older. Full ophthalmologic examinations, including slit lamp examination and intraocular pressure measurements, were performed on subjects aged 19 years or older.

Among the 30,401 subjects aged 3 years or older who underwent ophthalmic examination, 30,162 subjects underwent ocular alignment assessment. Of these, 24,227 subjects were excluded for the following reasons: 1) <5 years of age or >18 years of age, 2) missing refractive

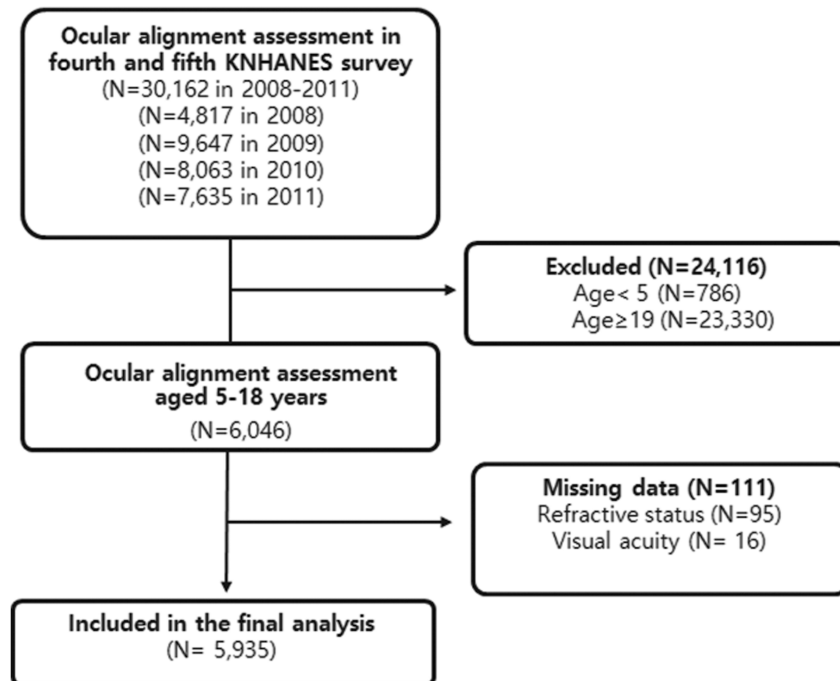

Fig 1. A flowchart showing study participants for final analysis.

<https://doi.org/10.1371/journal.pone.0191857.g001>

error data, or 3) missing VA assessment data (Fig 1). All missing data resulted from nonresponse. Finally, a total of 5,935 subjects (3,116 males and 2,819 females) were included in the present study.

This survey was reviewed and approved by the Institutional Review Board of the Korean Centers for Disease Control and Prevention and all participants provided written informed consent. The study was conducted in accordance with the Declaration of Helsinki.

### Questionnaire and demographic and socioeconomic variables

A detailed interviewer-administered questionnaire regarding socioeconomic and medical information was obtained from one of the subject’s parents or an accompanying guardian. All subjects were asked the following questions: “Have you ever been diagnosed with any disease by physicians?” If a subject answered yes, the subject was asked to record the specific disease name. “How much is whole income of your family?” The answer to this question was to write in exact amount and it was recorded into quartiles. “Do your family have your own house?” The answer would be yes or no, if yes, the subject had to choose one or more.

Demographic and socioeconomic data included the following variables: age (5–8 years, 9–12 years, 13–15 years, or 16–18 years), sex (male or female), residential area (urban or rural), monthly household income (lowest-second quartile or third to highest quartile), house ownership (yes or no), and highest maternal educational level achieved (middle school graduate or lower or high school graduate or higher).

### VA assessment and definitions for refractive error and amblyopia

With subjects wearing their glasses (if applicable), uncorrected VA and spectacle-corrected VA were evaluated from a distance of 4 m using an international standard vision chart based on the logarithm of the minimum angle of resolution (logMAR) scale (Jin’s vision chart, Seoul,

South Korea). Refractive data of all participants were obtained using an autorefractor-keratometer (KR8800; Topcon, Tokyo, Japan). If the uncorrected or spectacle-corrected VA was lower than logMAR 0.1 (Snellen, 20/25), corrected VA was obtained after autorefraction. If the corrected VA after autorefraction was lower than logMAR 0.1, a pinhole was added to measure the final corrected VA.

Refractive errors were classified using the spherical equivalents (SE), which were calculated as the spherical value plus 1/2 cylindrical value. Emmetropia was defined as  $-0.5$  to  $<+0.5$  diopters (D); mild myopia was defined as  $-3.0$  to  $<-0.5$  D; moderate myopia was defined as  $-6.0$  to  $<-3.0$  D; high myopia was defined as  $<-6.0$  D; and hyperopia was defined as  $\geq+0.50$  D. If anisometropia was present, the refractive error was defined as SE of the less hyperopic eye because accommodative convergence is potentially driven by accommodation of the less hyperopic eye. Astigmatism was defined as a cylindrical error  $\geq 1.0$  D. If astigmatism was bilaterally present, the more astigmatic eye was used to measure astigmatic refractive error. Unilateral amblyopia was defined as at least a 2-line interocular difference in BCVA with  $<20/32$  in the worse eye. Bilateral amblyopia was defined as decreased BCVA  $\leq 20/40$  in both eyes. Clinical variables included the following variables: refractive error (emmetropia, mild myopia, moderate myopia, high myopia, and hyperopia), anisometropia ( $<1.0$  D or  $\geq 1.0$  D), and astigmatism ( $<1.0$  D or  $\geq 1.0$  D).

### Ocular alignment assessment and strabismus definition

Ocular alignment was evaluated using the alternate prism and cover test with fixation targets at 4-m distance. Patients wore glasses (if applicable) and were evaluated by well-trained ophthalmology residents. When a subject's visual acuity was insufficient to maintain fixation on a distant target, the corneal reflection test was used with or without a prism. Any abnormalities, including horizontal or vertical strabismus, were recorded. Among these, horizontal strabismus was categorized into one of the following: exodeviation  $\geq 15$  prism diopter (PD), exodeviation 1–14 PD, orthotropia, esodeviation 1–9 PD, and esodeviation  $\geq 10$  PD. We decided exodeviation  $\geq 15$  PD and esodeviation  $\geq 10$  PD were clinically significant strabismus, which may be a threshold for strabismus surgery [26–28]; thus, we used this classification for association analyses. A first-degree relative with a history of strabismus was also included.

### Statistical analysis

KNHANES sampling was weighted by adjusting for oversampling and nonresponses [29]. Statistical analyses were performed using SPSS software, version 23.0 (SPSS, Inc., Chicago, IL, USA) and SAS software, version 9.4 (SAS, Inc., Cary, NC, USA). Prevalence was assessed with a 95% confidence interval (CI). Univariate and multivariate logistic regression analyses were conducted to evaluate associations among age, sex, highest maternal education, residential area, house ownership, monthly income, refractive error, anisometropia, astigmatism, amblyopia, and family history of strabismus. Less hyperopic eye for SE refractive error and the more astigmatic eye for astigmatism were chosen for analyses. To measure the association between risk factors and horizontal strabismus, odds ratios (ORs) and 95% CIs were calculated. P values  $<0.05$  were considered statistically significant.

## Results

### Prevalence of strabismus

Among the eligible 5,935 subjects, 5,275 subjects (88.9%) had orthotropia, 533 (8.9%) had an exodeviation 1–14 PD, 84 (1.4%) had an exodeviation  $\geq 15$  PD, 13 (0.2%) had an esodeviation

$\geq 10$  PD, and 30 (0.5%) had an esodeviation 1–9 PD. The estimated prevalence of all exodeviations was 10.5% (95% CI, 9.3–11.8), and the prevalence of all esodeviations was 0.8% (95% CI, 0.5–1.2). The overall estimated prevalence of clinically significant horizontal strabismus (exodeviation  $\geq 15$  PD or esodeviation  $\geq 10$  PD) was 1.6% (95% CI, 1.2–2.1). Among them, three subjects in clinically significant exodeviation had been diagnosed with strabismus and no one had been diagnosed with strabismus in clinically significant esodeviation.

### Associations of demographic, socioeconomic, and clinical factors with strabismus

General characteristics of the study population in association analyses are shown in Table 2.

The associations between various risk factors and clinically significant exodeviation are shown in Table 3. After adjusting for all potential risk factors, amblyopia (adjusted odds ratio [aOR], 6.45; 95% CI, 2.14–19.44;  $p = 0.001$ ), family history of strabismus (aOR, 4.91; 95% CI, 1.71–14.08;  $p = 0.003$ ) and astigmatism  $\geq 1.0$  D (aOR, 1.84; 95% CI, 1.13–2.98;  $p = 0.014$ ) were significantly associated with clinically significant exodeviation. Age group, sex, highest maternal education, residential area, house ownership, monthly income, refractive error and anisometropia were not associated with exodeviation in either univariate or multivariate logistic regression analyses.

The associations between various risk factors and clinically significant esodeviation are shown in Table 4. Hyperopia (aOR, 12.16; 95% CI, 1.31–113.04;  $p = 0.028$ ) and amblyopia (aOR, 4.70; 95% CI, 1.12–19.81;  $p = 0.035$ ) were associated with clinically significant esodeviation after adjusting for other variables. Other variables were not associated with clinically significant esodeviation in either univariate or multivariate logistic regression analyses.

### Discussion

Previous population-based studies reported varying strabismus prevalence based on the age and ethnicity of the population or the study design; strabismus prevalence in children has been reported to be from 0.8% (Singapore) to 5.65% (China) [1–9]. Population-based studies regarding the prevalence of strabismus in South Korea are limited; only one study reported the prevalence of manifest strabismus (the definition and classification of strabismus were not disclosed) as 5.8% in 36,973 kindergarten children 3–5 years of age [30]. In the present study, the estimated prevalence of clinically significant horizontal strabismus was 1.6%, which is lower than that of previous studies conducted in South Korea, China, USA, and UK [1, 5, 7–9, 30, 31], similar to Japan [32], and higher than Singapore [6]. Because this study evaluated the prevalence of “clinically significant” horizontal strabismus, a direct comparison of our results with those of other studies that evaluated only manifest strabismus is not appropriate. Only Avon Longitudinal Study of Parents and Children (ALSPAC) took into account the prevalence of latent strabismus and found the prevalence of clinically significant divergence (manifest or latent with  $\geq 15$  PD) was 0.6% (95% CI; 0.5–0.8) and clinically significant convergence (manifest or latent with  $\geq 10$  PD) was 2.8% (95% CI; 2.5–3.3) in UK children [1].

The exodeviation:esodeviation ratio was 6.4:1, and the higher proportion of exodeviation was similar to other studies of Asian populations (ratio range: 2.5:1 to 51.0:1) [5, 6, 8, 32]. This may correlate with lower hyperopia prevalence in Korea compared with other Asian populations. In contrast, Caucasian populations who have a higher prevalence of hyperopia showed a similar or inverse exodeviation:esodeviation ratio [1, 9, 16, 17].

Strabismus presence was significantly associated with several variables. Among the various potential risk factors, amblyopia was the only factor that influenced both strabismus types; subjects with amblyopia were 6.45 times more likely to have exodeviation and 4.70 times more

**Table 2. Clinical characteristics of subjects for association analysis (n = 5,935).**

| Variables                           | n    | %    | Clinically significant exodeviation | Clinically significant esodeviation |
|-------------------------------------|------|------|-------------------------------------|-------------------------------------|
|                                     |      |      | (n = 84, 1.4%)                      | (n = 13, 0.2%)                      |
| <b>Age</b>                          |      |      |                                     |                                     |
| 5–8 years                           | 1751 | 23.1 | 25                                  | 5                                   |
| 9–12 years                          | 1858 | 28.7 | 27                                  | 3                                   |
| 13–15 years                         | 1289 | 24   | 16                                  | 3                                   |
| 16–18 years                         | 1037 | 24.1 | 16                                  | 2                                   |
| <b>Sex</b>                          |      |      |                                     |                                     |
| Female                              | 2819 | 47   | 44                                  | 5                                   |
| Male                                | 3116 | 53   | 40                                  | 8                                   |
| <b>Maternal education</b>           |      |      |                                     |                                     |
| Middle school or lower              | 450  | 9.1  | 8                                   | 1                                   |
| High school or higher               | 4858 | 76.9 | 61                                  | 9                                   |
| <b>Residential area</b>             |      |      |                                     |                                     |
| Rural                               | 926  | 16.8 | 19                                  | 1                                   |
| Town                                | 5009 | 83.2 | 65                                  | 12                                  |
| <b>House ownership</b>              |      |      |                                     |                                     |
| No                                  | 1997 | 36.9 | 23                                  | 6                                   |
| Yes                                 | 3922 | 62.8 | 59                                  | 7                                   |
| <b>Monthly income</b>               |      |      |                                     |                                     |
| Low                                 | 2154 | 41.1 | 33                                  | 5                                   |
| High                                | 3704 | 57.5 | 47                                  | 8                                   |
| <b>SE refractive error*</b>         |      |      |                                     |                                     |
| -0.5 to < 0.5 D (emmetropia)        | 1629 | 27.4 | 17                                  | 1                                   |
| ≥ 0.5 D (hyperopia)                 | 285  | 4.8  | 5                                   | 4                                   |
| -3.0 to < -0.5 D (mild myopia)      | 2484 | 41.9 | 32                                  | 3                                   |
| -6.0 to < -3.0 D (moderate myopia)  | 1179 | 19.9 | 25                                  | 4                                   |
| < -6.0 D (high myopia)              | 358  | 6    | 5                                   | 1                                   |
| <b>Anisometropia</b>                |      |      |                                     |                                     |
| < 1.0 D                             | 5131 | 86.5 | 66                                  | 9                                   |
| ≥ 1.0 D                             | 804  | 13.5 | 18                                  | 4                                   |
| <b>Astigmatism*</b>                 |      |      |                                     |                                     |
| < 1.0 D                             | 3917 | 66   | 41                                  | 4                                   |
| ≥ 1.0 D                             | 2018 | 34   | 43                                  | 9                                   |
| <b>Amblyopia</b>                    |      |      |                                     |                                     |
| No                                  | 5858 | 98.7 | 79                                  | 11                                  |
| Yes                                 | 77   | 1.3  | 5                                   | 2                                   |
| <b>Family history of strabismus</b> |      |      |                                     |                                     |
| No/No response                      | 5723 | 96.4 | 76                                  | 13                                  |
| Yes                                 | 115  | 3.6  | 8                                   | 0                                   |

SE = spherical equivalent

\*Less hyperopic eye for SE refractive error and the more astigmatic eye for astigmatism were chosen for analyses.

<https://doi.org/10.1371/journal.pone.0191857.t002>

likely to have esodeviation. In the Strabismus, Amblyopia and Refractive Error in Singaporean Preschoolers Study (STARS), children with strabismus showed a 12.85-fold association with amblyopia [15]. The Sydney Myopia Study (SMS) also reported that children with strabismus were statistically significantly more likely to have amblyopia than children without strabismus

Table 3. Univariate and multivariate logistic regression analysis for clinically significant exodeviation in children and adolescents.

| Risk factors                   | Univariate analysis |                   |              | Multivariate analysis* |                   |              |
|--------------------------------|---------------------|-------------------|--------------|------------------------|-------------------|--------------|
|                                | OR                  | 95% CI            | P            | aOR                    | 95% CI            | P            |
| Age                            |                     |                   |              |                        |                   |              |
| 5–8 years                      | 1.0 (ref)           |                   |              | 1.0 (Ref)              |                   |              |
| 9–12 years                     | 0.83                | 0.45–1.55         | 0.562        | 0.71                   | 0.35–1.45         | 0.341        |
| 13–15 years                    | 0.70                | 0.33–1.51         | 0.365        | 0.44                   | 0.19–1.04         | 0.061        |
| 16–18 years                    | 0.87                | 0.40–1.90         | 0.733        | 0.53                   | 0.22–1.29         | 0.162        |
| Sex                            |                     |                   |              |                        |                   |              |
| Female                         | 1.0 (ref)           |                   |              | 1.0 (Ref)              |                   |              |
| Male                           | 0.96                | 0.57–1.63         | 0.892        | 0.93                   | 0.56–1.57         | 0.792        |
| Maternal education             |                     |                   |              |                        |                   |              |
| Middle school or lower         | 1.0 (Ref)           |                   |              | 1.0 (Ref)              |                   |              |
| High school or higher          | 0.51                | 0.21–1.24         | 0.139        | 0.51                   | 0.23–1.11         | 0.083        |
| Residential area               |                     |                   |              |                        |                   |              |
| Rural                          | 1.0 (Ref)           |                   |              | 1.0 (Ref)              |                   |              |
| Town                           | 0.62                | 0.32–1.20         | 0.156        | 0.62                   | 0.35–1.11         | 0.109        |
| House ownership                |                     |                   |              |                        |                   |              |
| No                             | 1.0 (Ref)           |                   |              | 1.0 (Ref)              |                   |              |
| Yes                            | 1.11                | 0.61–2.04         | 0.729        | 1.19                   | 0.64–2.19         | 0.587        |
| Monthly income                 |                     |                   |              |                        |                   |              |
| Low                            | 1.0 (Ref)           |                   |              | 1.0 (Ref)              |                   |              |
| High                           | 0.76                | 0.44–1.31         | 0.314        | 0.84                   | 0.50–1.38         | 0.484        |
| SE refractive error†           |                     |                   |              |                        |                   |              |
| -0.5 to < 0.5 D (emmetropia)   | 1.0 (Ref)           |                   |              | 1.0 (Ref)              |                   |              |
| ≥ 0.5 D (hyperopia)            | 2.54                | 0.65–9.93         | 0.179        | 1.69                   | 0.56–5.11         | 0.352        |
| -3.0 to < -0.5 D (mild myopia) | 1.20                | 0.57–2.50         | 0.637        | 1.20                   | 0.57–2.51         | 0.631        |
| -6.0 to < -3.0 D (mod myopia)  | 1.93                | 0.91–4.13         | 0.088        | 1.94                   | 0.86–4.39         | 0.110        |
| < -6.0 D (high myopia)         | 1.37                | 0.45–4.16         | 0.575        | 1.33                   | 0.39–4.51         | 0.647        |
| Anisometropia                  |                     |                   |              |                        |                   |              |
| < 1.0 D                        | 1.0 (Ref)           |                   |              | 1.0 (Ref)              |                   |              |
| ≥ 1.0 D                        | 1.38                | 0.76–2.51         | 0.287        | 1.01                   | 0.52–1.96         | 0.973        |
| Astigmatism†                   |                     |                   |              |                        |                   |              |
| < 1.0 D                        | 1.0 (Ref)           |                   |              | 1.0 (Ref)              |                   |              |
| ≥ 1.0 D                        | <b>2.00</b>         | <b>1.19–3.37</b>  | <b>0.009</b> | <b>1.84</b>            | <b>1.13–2.98</b>  | <b>0.014</b> |
| Amblyopia                      |                     |                   |              |                        |                   |              |
| No                             | 1.0 (Ref)           |                   |              | 1.0 (Ref)              |                   |              |
| Yes                            | <b>7.92</b>         | <b>2.24–28.02</b> | <b>0.001</b> | <b>6.45</b>            | <b>2.14–19.44</b> | <b>0.001</b> |
| Family history of strabismus   |                     |                   |              |                        |                   |              |
| No/No Response                 | 1.0 (Ref)           |                   |              | 1.0 (Ref)              |                   |              |
| Yes                            | <b>4.49</b>         | <b>1.65–12.23</b> | <b>0.003</b> | <b>4.91</b>            | <b>1.71–14.08</b> | <b>0.003</b> |

OR = odds ratio, aOR = adjusted odds ratio, CI = confidence interval, SE = spherical equivalent refractive error, D = diopters, mod = moderate

Odds ratios in boldface are statistically significant.

\*Adjusted for all variables listed in the table.

† Less hyperopic eye for SE refractive error and the more astigmatic eye for astigmatism were chosen for analyses.

<https://doi.org/10.1371/journal.pone.0191857.t003>

( $p < 0.001$ ) [2]. The present study clearly showed an association between amblyopia and both strabismus types.



**Table 4. Univariate and multivariate logistic regression analysis for clinically significant esodeviation in children and adolescents.**

| Risk factors                   | Univariate analysis |                    |              | Multivariate analysis* |                    |              |
|--------------------------------|---------------------|--------------------|--------------|------------------------|--------------------|--------------|
|                                | OR                  | 95% CI             | P            | aOR                    | 95% CI             | P            |
| <b>Age</b>                     |                     |                    |              |                        |                    |              |
| 5–8 years                      | 1.0 (ref)           |                    |              | 1.0 (Ref)              |                    |              |
| 9–12 years                     | 1.32                | 0.25–6.97          | 0.742        | 1.11                   | 0.30–4.07          | 0.880        |
| 13–15 years                    | 0.86                | 0.14–5.30          | 0.866        | 0.55                   | 0.09–3.46          | 0.523        |
| 16–18 years                    | 0.84                | 0.14–5.03          | 0.849        | 0.52                   | 0.06–4.57          | 0.550        |
| <b>Sex</b>                     |                     |                    |              |                        |                    |              |
| Female                         | 1.0 (ref)           |                    |              | 1.0 (Ref)              |                    |              |
| Male                           | 2.23                | 0.69–7.20          | 0.180        | 2.28                   | 0.68–7.65          | 0.181        |
| <b>Maternal education</b>      |                     |                    |              |                        |                    |              |
| Middle school or lower         | 1.0 (Ref)           |                    |              | 1.0 (Ref)              |                    |              |
| High school or higher          | 1.40                | 0.16–12.11         | 0.759        | 1.05                   | 0.10–10.96         | 0.966        |
| <b>Residential area</b>        |                     |                    |              |                        |                    |              |
| Rural                          | 1.0 (Ref)           |                    |              | 1.0 (Ref)              |                    |              |
| Town                           | 3.45                | 0.42–28.35         | 0.249        | 3.01                   | 0.35–26.91         | 0.311        |
| <b>House ownership</b>         |                     |                    |              |                        |                    |              |
| No                             | 1.0 (Ref)           |                    |              | 1.0 (Ref)              |                    |              |
| Yes                            | 1.38                | 0.39–4.89          | 0.621        | 1.61                   | 0.42–6.20          | 0.486        |
| <b>Monthly income</b>          |                     |                    |              |                        |                    |              |
| Low                            | 1.0 (Ref)           |                    |              | 1.0 (Ref)              |                    |              |
| High                           | 1.19                | 0.30–4.71          | 0.803        | 1.02                   | 0.37–2.83          | 0.967        |
| <b>SE refractive error†</b>    |                     |                    |              |                        |                    |              |
| -0.5 to < 0.5 D (emmetropia)   | 1.0 (Ref)           |                    |              | 1.0 (Ref)              |                    |              |
| ≥ 0.5 D (hyperopia)            | <b>19.57</b>        | <b>2.13–179.79</b> | <b>0.009</b> | <b>12.16</b>           | <b>1.31–113.04</b> | <b>0.028</b> |
| -3.0 to < -0.5 D (mild myopia) | 2.77                | 0.27–28.74         | 0.392        | 2.31                   | 0.19–28.19         | 0.513        |
| -6.0 to < -3.0 D (mod myopia)  | 10.04               | 0.97–104.24        | 0.053        | 6.45                   | 0.55–75.67         | 0.138        |
| < -6.0 D (high myopia)         | 3.20                | 0.20–51.70         | 0.411        | 1.62                   | 0.08–33.77         | 0.754        |
| <b>Anisometropia</b>           |                     |                    |              |                        |                    |              |
| < 1.0 D                        | 1.0 (Ref)           |                    |              | 1.0 (Ref)              |                    |              |
| ≥ 1.0 D                        | 4.24                | 0.96–18.78         | 0.058        | 2.74                   | 0.76–9.88          | 0.124        |
| <b>Astigmatism†</b>            |                     |                    |              |                        |                    |              |
| < 1.0 D                        | 1.0 (Ref)           |                    |              | 1.0 (Ref)              |                    |              |
| ≥ 1.0 D                        | 3.70                | 1.00–13.74         | 0.051        | 2.32                   | 0.63–8.54          | 0.206        |
| <b>Amblyopia</b>               |                     |                    |              |                        |                    |              |
| No                             | 1.0 (Ref)           |                    |              | 1.0 (Ref)              |                    |              |
| Yes                            | <b>10.47</b>        | <b>2.13–51.60</b>  | <b>0.004</b> | <b>4.70</b>            | <b>1.12–19.81</b>  | <b>0.035</b> |

OR = odds ratio, aOR = adjusted odds ratio, CI = confidence interval, SE = spherical equivalent refractive error, mod = moderate, D = diopter

Odds ratios in boldface are statistically significant.

\*Adjusted for all variables listed in the table.

† Less hyperopic eye for SE refractive error and the more astigmatic eye for astigmatism were chosen for analyses.

<https://doi.org/10.1371/journal.pone.0191857.t004>

Refractive error and strabismus are closely related [2, 15, 17, 33]. Among refractive error types, associations between hyperopia and esotropia have been firmly established, especially in children who have significant hyperopia (≥+3.00 D) [2, 16, 19]. However, myopia and exotropia, both more prevalent in Asian subjects, have not been thoroughly evaluated. Consistent with previous studies of Asian populations [34–36], myopia was more prevalent than hyperopia in our study; 67.8% of subjects were myopic, 27.4% of subjects were emmetropic and only

4.8% of subjects were hyperopic. To explore the relationship between myopia and exodeviation in detail, we divided myopia into degrees based on SE level: mild ( $-3.0$  to  $<-0.5$  D), moderate ( $-6.0$  to  $<-3.0$  D) and high ( $<-6.0$  D). However, we found no association between any myopia level and clinically significant exodeviation. Previous studies have reported conflicting results. The STARS, another population-based study of Asian children, found that refractive error was not an independent risk factor for strabismus [15]. Meanwhile, subgroup analyses in the Multi-Ethnic Pediatric Eye Disease Study (MEPEDS) showed that subjects with myopia  $\leq -1.0$  D in at least 1 eye were 2.46 times more at risk for exotropia compared with subjects with emmetropia  $<1.0$  D [16]. SMS reported that all refractive errors, including myopia, significant hyperopia ( $\geq +3.0$  D), astigmatism, and anisometropia, were more common in children with strabismus [2]; however, exodeviations and esodeviations were not separately analyzed. The Nanjing Pediatric Vision Project (NPVP) reported that Chinese children with mild myopia  $<-1.0$  D had a 40-fold greater risk of exotropia compared with mild hyperopia 0 to  $<1.0$  D [3]. However, among the 5,831 Chinese children in the NPVP [3], myopia was only found in 44 (0.8%) children and the myopia rate was lower than in our study population. Increased accommodative demand in exodeviation could account for this association [37–39]. Further research is needed to clarify the relationship between exodeviation and myopia.

Hyperopia was found to increase the risk of esodeviation in the present study. Several studies have shown that hyperopia is risk factor for esotropia [1–3, 9, 15] and the risk increases with each D of increasing hyperopia [3, 16]. The risk of esotropia in children with hyperopia  $\geq +5.0$  D was 180 times greater than in children with  $<+1.0$  D of hyperopia [3]. However, in the present study, due to the low proportion of high hyperopia subjects in our study population, further analyses based on levels of hyperopia were not feasible.

Astigmatism  $\geq 1.0$  D was associated with a 1.84-fold increased risk for clinically significant exodeviation in this study. In line with this study result, STARS reported astigmatism  $\geq 1.0$  D increased the risk of strabismus (the direction was not mentioned) 4 times more than astigmatism  $<1.0$  D.<sup>7</sup> In the MEPEDS and Baltimore Pediatric Eye Disease Study (BPEDS), astigmatism  $\geq 2.5$  D was associated with 6-fold risk of exotropia in 6- to 72-month old children [16]. In the NPVP, hyperopic astigmatism 0.5 to  $<1.0$  D and all myopic astigmatism were independent risk factors for exotropia (aOR, 3.56 and 1.90, respectively) [3]. The different influences of astigmatism on exodeviation and esodeviation require additional research.

Although no specific genetic loci for strabismus have been determined, several studies concluded it is heritable [19]. A study regarding associations between siblings and strabismus from the Collaborative Perinatal Project reported that any sibling pair had more than twice the risk of developing exotropia or esotropia compared with siblings from separate single births, respectively [40]. STARS also reported that a child who had a sibling with strabismus was 41 times more likely to develop strabismus (95% CI, 9.03–188.00) [15]. ALSPAC showed that a family history of strabismus/amblyopia was associated with convergent strabismus (aOR, 1.38; 95% CI, 0.94–2.03), but not with divergent strabismus [1]. MEPEDS and BPEDS reported that a family history of strabismus was associated with 2-fold increased risk of exotropia (OR, 2.29; 95% CI, 1.24–4.13;  $p = 0.006$ ) [16]. In this study, subjects who had a family history of strabismus were 4.82 times more likely to develop exodeviation than subjects without a family history. None of the children with esodeviation in our study had family histories of strabismus; however, our study included only a few children with esodeviation, thus, drawing conclusions from this sub-sample is difficult.

Associations between socioeconomic variables and pediatric strabismus yielded conflicting results. STARS reported that higher paternal education had a protective effect against strabismus and in the Millennium Cohort Study of UK children, socioeconomic status was inversely associated with strabismus [31]; however, SMS, MEPED, BPEDS, and ALSPAC reported that

parental education, monthly income, and house ownership were not associated with strabismus [1, 15, 16]. We also did not find any associations between maternal education, monthly income, house ownership, or residential area and clinically significant strabismus, similar to these previous studies.

This study has several limitations. Refractive errors were not evaluated under cycloplegic conditions, which could bias the results in younger subjects who tended to accommodate more actively than older subjects. Studies of refractive errors measured under non-cycloplegic conditions found a myopic shift in 0.19–1.19 D when compared with cycloplegic refraction [41–44], but, hyperopic shifts may exist in some subjects [43]. Hence, we set the reference level for emmetropia to  $-0.5$  D to  $<+0.5$  D. However, this study results should be interpreted with a caution considering the non-cycloplegic nature of refraction measurements. Second, the health survey stage lacked clinical detail and did not yield reliable data on heterophoria and heterotropia. A certain amount of heterophoria is considered physiological and a small angle in horizontal heterotropia cases is neither cosmetically noticeable nor likely to lead to asthenopia [45]. Therefore, only significant degrees of ocular deviation were considered to be detected reliably and were considered for the present analysis. Third, ocular alignment assessment was carried out by multiple trainee ophthalmologists, but the KNHANES conducted quality management continuously to make up for the weaknesses. Fourth, because slit lamp examination was not performed on our subjects, other potential risk factors associated with intraocular structures were not evaluated in this study. Finally, perinatal factors such as birth weight, gestational age and maternal age at birth were only documented in around half of children, and we therefore did not evaluate the association of these factors with strabismus.

In spite of these limitations, this study is a large population-based survey analyzed using a stratified and multistage probability sampling design. The results are intended representative of the entire South Korean population, which is relatively homogenous, in terms of environment and ethnicity. A further highlight of the study is the detailed finding of an association between myopia level and exotropia, both more common than hyperopia and esotropia in Asian populations.

## Acknowledgments

### Epidemiologic Survey Committee of the Korean Ophthalmological Society

Se Woong Kang (Department of Ophthalmology, Samsung Medical Center, Sungkyunkwan University School of Medicine, Seoul, South Korea)

Seung-Hee Baek (Department of Ophthalmology, Kim's Eye Hospital, Konyang University College of Medicine, Seoul, South Korea)

Chan Yun Kim (Institute of Vision Research, Department of Ophthalmology, Yonsei University College of Medicine, Seoul, South Korea)

Sang-Duck Kim (Department of Ophthalmology, Wonkwang University College of Medicine, Iksan, South Korea)

Seung-Hyun Kim (Department of Ophthalmology, Korea University College of Medicine, Seoul, South Korea)

Jong Soo Lee (Department of Ophthalmology, Pusan National University College of Medicine, Busan, South Korea)

Key Hwan Lim (Department of Ophthalmology, Ewha Womans University College of Medicine, Mok-dong Hospital, Seoul, South Korea)

Ki Ho Park (Department of Ophthalmology, Seoul National University College of Medicine, Seoul, South Korea)

Young Jeung Park (Department of Ophthalmology, Cheil Eye Hospital, Daegu, South Korea)

Jae Pil Shin (Department of Ophthalmology, Kyungpook National University School of Medicine, Daegu, South Korea)

Su Jeong Song (Department of Ophthalmology, Kangbuk Samsung Hospital, Sungkyunkwan University School of Medicine, Seoul, South Korea)

Suk-Woo Yang (Department of Ophthalmology, The Catholic University of Korea College of Medicine, Seoul, South Korea)

Kyung-Chul Yoon (Department of Ophthalmology, Chonnam National University Hospital, Chonnam National University Medical School, Gwangju, South Korea)

Seung-Young Yu (Department of Ophthalmology, Kyung Hee University School of Medicine, Seoul, South Korea)

## Author Contributions

**Conceptualization:** Kyung Eun Han, Seung-Hee Baek, Seung-Hyun Kim, Key Hwan Lim.

**Formal analysis:** Kyung Eun Han.

**Investigation:** Kyung Eun Han, Seung-Hee Baek, Seung-Hyun Kim.

**Methodology:** Kyung Eun Han, Key Hwan Lim.

**Supervision:** Key Hwan Lim.

**Writing – original draft:** Kyung Eun Han.

**Writing – review & editing:** Kyung Eun Han, Seung-Hee Baek, Seung-Hyun Kim, Key Hwan Lim.

## References

1. Williams C, Northstone K, Howard M, Harvey I, Harrad RA, Sparrow JM. Prevalence and risk factors for common vision problems in children: data from the ALSPAC study. *The British journal of ophthalmology*. 2008; 92(7):959–64. Epub 2008/05/16. <https://doi.org/10.1136/bjo.2007.134700> PMID: 18480306.
2. Robaei D, Rose KA, Kifley A, Cosstick M, Ip JM, Mitchell P. Factors associated with childhood strabismus: findings from a population-based study. *Ophthalmology*. 2006; 113(7):1146–53. Epub 2006/05/06. <https://doi.org/10.1016/j.ophtha.2006.02.019> PMID: 16675019.
3. Zhu H, Yu JJ, Yu RB, Ding H, Bai J, Chen J, et al. Association between childhood strabismus and refractive error in Chinese preschool children. *PloS one*. 2015; 10(3):e0120720. Epub 2015/03/21. <https://doi.org/10.1371/journal.pone.0120720> PMID: 25793499; PubMed Central PMCID: PMC4368197.
4. He M, Zeng J, Liu Y, Xu J, Pokharel GP, Ellwein LB. Refractive error and visual impairment in urban children in southern china. *Investigative ophthalmology & visual science*. 2004; 45(3):793–9. Epub 2004/02/27. PMID: 14985292.
5. Chen X, Fu Z, Yu J, Ding H, Bai J, Chen J, et al. Prevalence of amblyopia and strabismus in Eastern China: results from screening of preschool children aged 36–72 months. *The British journal of ophthalmology*. 2015. Epub 2015/08/12. <https://doi.org/10.1136/bjophthalmol-2015-306999> PMID: 26261229.
6. Chia A, Dirani M, Chan YH, Gazzard G, Au Eong KG, Selvaraj P, et al. Prevalence of amblyopia and strabismus in young singaporean chinese children. *Investigative ophthalmology & visual science*. 2010; 51(7):3411–7. <https://doi.org/10.1167/iops.09-4461> PMID: 20207979; PubMed Central PMCID: PMC43979488.
7. McKean-Cowdin R, Cotter SA, Tarczy-Hornoch K, Wen G, Kim J, Borchert M, et al. Prevalence of amblyopia or strabismus in asian and non-Hispanic white preschool children: multi-ethnic pediatric eye disease study. *Ophthalmology*. 2013; 120(10):2117–24. <https://doi.org/10.1016/j.ophtha.2013.03.001> PMID: 23697956.
8. Fu J, Li SM, Liu LR, Li JL, Li SY, Zhu BD, et al. Prevalence of amblyopia and strabismus in a population of 7th-grade junior high school students in Central China: the Anyang Childhood Eye Study (ACES).

- Ophthalmic Epidemiol. 2014; 21(3):197–203. Epub 2014/04/20. <https://doi.org/10.3109/09286586.2014.904371> PMID: 24742059.
9. Friedman DS, Repka MX, Katz J, Giordano L, Ibrionke J, Hawse P, et al. Prevalence of amblyopia and strabismus in white and African American children aged 6 through 71 months the Baltimore Pediatric Eye Disease Study. *Ophthalmology*. 2009; 116(11):2128–34 e1-2. <https://doi.org/10.1016/j.ophtha.2009.04.034> PMID: 19762084; PubMed Central PMCID: PMCPMC2783780.
  10. Bez Y, Coskun E, Erol K, Cingu AK, Eren Z, Topcuoglu V, et al. Adult strabismus and social phobia: a case-controlled study. *J aapos*. 2009; 13(3):249–52. Epub 2009/06/23. <https://doi.org/10.1016/j.jaapos.2009.02.010> PMID: 19541264.
  11. Mojon-Azzi SM, Mojon DS. Strabismus and employment: the opinion of headhunters. *Acta ophthalmologica*. 2009; 87(7):784–8. Epub 2008/11/04. <https://doi.org/10.1111/j.1755-3768.2008.01352.x> PMID: 18976309.
  12. Mojon-Azzi SM, Kunz A, Mojon DS. Strabismus and discrimination in children: are children with strabismus invited to fewer birthday parties? *The British journal of ophthalmology*. 2011; 95(4):473–6. Epub 2010/08/20. <https://doi.org/10.1136/bjo.2010.185793> PMID: 20720253.
  13. Mojon-Azzi SM, Potnik W, Mojon DS. Opinions of dating agents about strabismic subjects' ability to find a partner. *The British journal of ophthalmology*. 2008; 92(6):765–9. Epub 2008/06/05. <https://doi.org/10.1136/bjo.2007.128884> PMID: 18523082.
  14. Satterfield D, Keltner JL, Morrison TL. Psychosocial aspects of strabismus study. *Archives of ophthalmology (Chicago, Ill: 1960)*. 1993; 111(8):1100–5. Epub 1993/08/01. PMID: 8166786.
  15. Chia A, Lin X, Dirani M, Gazzard G, Ramamurthy D, Quah BL, et al. Risk factors for strabismus and amblyopia in young Singapore Chinese children. *Ophthalmic Epidemiol*. 2013; 20(3):138–47. <https://doi.org/10.3109/09286586.2013.767354> PMID: 23713916.
  16. Cotter SA, Varma R, Tarczy-Hornoch K, McKean-Cowdin R, Lin J, Wen G, et al. Risk factors associated with childhood strabismus: the multi-ethnic pediatric eye disease and Baltimore pediatric eye disease studies. *Ophthalmology*. 2011; 118(11):2251–61. <https://doi.org/10.1016/j.ophtha.2011.06.032> PMID: 21856012; PubMed Central PMCID: PMCPMC3208120.
  17. Chew E, Remaley NA, Tamboli A, Zhao J, Podgor MJ, Klebanoff M. Risk factors for esotropia and exotropia. *Archives of ophthalmology (Chicago, Ill: 1960)*. 1994; 112(10):1349–55. Epub 1994/10/01. PMID: 7945039.
  18. Torp-Pedersen T, Boyd HA, Poulsen G, Haargaard B, Wohlfahrt J, Holmes JM, et al. Perinatal risk factors for strabismus. *Int J Epidemiol*. 2010; 39(5):1229–39. <https://doi.org/10.1093/ije/dyq092> PMID: 20525734.
  19. Abrahamsson M, Magnusson G, Sjostrand J. Inheritance of strabismus and the gain of using heredity to determine populations at risk of developing strabismus. *Acta ophthalmologica Scandinavica*. 1999; 77(6):653–7. Epub 2000/01/14. PMID: 10634557.
  20. Matsumura H, Hirai H. Prevalence of myopia and refractive changes in students from 3 to 17 years of age. *Survey of ophthalmology*. 1999; 44 Suppl 1:S109–15. Epub 1999/11/05. PMID: 10548123.
  21. Ma Y, Qu X, Zhu X, Xu X, Zhu J, Sankaridurg P, et al. Age-Specific Prevalence of Visual Impairment and Refractive Error in Children Aged 3–10 Years in Shanghai, China. *Investigative ophthalmology & visual science*. 2016; 57(14):6188–96. Epub 2016/11/15. <https://doi.org/10.1167/iovs.16-20243> PMID: 27842160.
  22. Yoon KC, Mun GH, Kim SD, Kim SH, Kim CY, Park KH, et al. Prevalence of eye diseases in South Korea: data from the Korea National Health and Nutrition Examination Survey 2008–2009. *Korean journal of ophthalmology: KJO*. 2011; 25(6):421–33. Epub 2011/12/02. <https://doi.org/10.3341/kjo.2011.25.6.421> PMID: 22131780; PubMed Central PMCID: PMCPMC3223710.
  23. Zhao J, Pan X, Sui R, Munoz SR, Sperduto RD, Ellwein LB. Refractive Error Study in Children: results from Shunyi District, China. *American journal of ophthalmology*. 2000; 129(4):427–35. Epub 2000/04/15. PMID: 10764849.
  24. Lim HT, Yoon JS, Hwang SS, Lee SY. Prevalence and associated sociodemographic factors of myopia in Korean children: the 2005 third Korea National Health and Nutrition Examination Survey (KNHANES III). *Japanese journal of ophthalmology*. 2012; 56(1):76–81. Epub 2011/10/07. <https://doi.org/10.1007/s10384-011-0090-7> PMID: 21975827.
  25. Matsuo T, Matsuo C. Comparison of prevalence rates of strabismus and amblyopia in Japanese elementary school children between the years 2003 and 2005. *Acta medica Okayama*. 2007; 61(6):329–34. Epub 2008/01/10. <https://doi.org/10.18926/AMO/32877> PMID: 18183077.
  26. Kim H, Yang HK, Hwang JM. Comparison of Long-term Surgical Outcomes Between Unilateral Recession and Unilateral Recession-Resection in Small-Angle Exotropia. *American journal of ophthalmology*. 2016; 166:141–8. Epub 2016/04/14. <https://doi.org/10.1016/j.ajo.2016.03.047> PMID: 27066724.

27. Stack RR, Burley CD, Bedggood A, Elder MJ. Unilateral versus bilateral medial rectus recession. *J aapos*. 2003; 7(4):263–7. Epub 2003/08/15. <https://doi.org/10.1016/mpa.2003.S1091853103001174> PMID: 12917613.
28. Wang L, Nelson LB. Outcome study of unilateral lateral rectus recession for small to moderate angle intermittent exotropia in children. *Journal of pediatric ophthalmology and strabismus*. 2010; 47(4):242–7. Epub 2009/10/31. <https://doi.org/10.3928/01913913-20091019-12> PMID: 19873943.
29. Holter D, Eliote D. Methods of weighting for unit nonresponse. *Statistician*. 1991; 40:333–42.
30. Lim HT, Yu YS, Park SH, Ahn H, Kim S, Lee M, et al. The Seoul Metropolitan Preschool Vision Screening Programme: results from South Korea. *The British journal of ophthalmology*. 2004; 88(7):929–33. <https://doi.org/10.1136/bjo.2003.029066> PMID: 15205240; PubMed Central PMCID: PMCPMC177222.
31. Pathai S, Cumberland PM, Rahi JS. Prevalence of and early-life influences on childhood strabismus: findings from the Millennium Cohort Study. *Archives of pediatrics & adolescent medicine*. 2010; 164(3):250–7. Epub 2010/03/03. <https://doi.org/10.1001/archpediatrics.2009.297> PMID: 20194258.
32. Matsuo T, Matsuo C. The prevalence of strabismus and amblyopia in Japanese elementary school children. *Ophthalmic Epidemiol*. 2005; 12(1):31–6. Epub 2005/04/26. <https://doi.org/10.1080/09286580490907805> PMID: 15848918.
33. Robaei D, Rose KA, Ojaimi E, Kifley A, Martin FJ, Mitchell P. Causes and associations of amblyopia in a population-based sample of 6-year-old Australian children. *Archives of ophthalmology (Chicago, Ill: 1960)*. 2006; 124(6):878–84. Epub 2006/06/14. <https://doi.org/10.1001/archophth.124.6.878> PMID: 16769842.
34. Asakuma T, Yasuda M, Ninomiya T, Noda Y, Arakawa S, Hashimoto S, et al. Prevalence and risk factors for myopic retinopathy in a Japanese population: the Hisayama Study. *Ophthalmology*. 2012; 119(9):1760–5. Epub 2012/05/15. <https://doi.org/10.1016/j.ophtha.2012.02.034> PMID: 22578442.
35. Jung SK, Lee JH, Kakizaki H, Jee D. Prevalence of myopia and its association with body stature and educational level in 19-year-old male conscripts in Seoul, South Korea. *Investigative ophthalmology & visual science*. 2012; 53(9):5579–83. Epub 2012/07/28. <https://doi.org/10.1167/iovs.12-10106> PMID: 22836765.
36. Dirani M, Chan YH, Gazzard G, Hornbeak DM, Leo SW, Selvaraj P, et al. Prevalence of refractive error in Singaporean Chinese children: the strabismus, amblyopia, and refractive error in young Singaporean Children (STARS) study. *Investigative ophthalmology & visual science*. 2010; 51(3):1348–55. Epub 2009/11/26. <https://doi.org/10.1167/iovs.09-3587> PMID: 19933197; PubMed Central PMCID: PMCPMC3979485.
37. Christensen AM, Wallman J. Evidence that increased scleral growth underlies visual deprivation myopia in chicks. *Investigative ophthalmology & visual science*. 1991; 32(7):2143–50. Epub 1991/06/01. PMID: 2055705.
38. Criswell MH, Goss DA. Myopia development in nonhuman primates—a literature review. *American journal of optometry and physiological optics*. 1983; 60(3):250–68. Epub 1983/03/01. PMID: 6405620.
39. Walsh LA, Laroche GR, Tremblay F. The use of binocular visual acuity in the assessment of intermittent exotropia. *J aapos*. 2000; 4(3):154–7. Epub 2000/06/10. PMID: 10849391.
40. Podgor MJ, Remaley NA, Chew E. Associations between siblings for esotropia and exotropia. *Archives of ophthalmology (Chicago, Ill: 1960)*. 1996; 114(6):739–44. Epub 1996/06/01. PMID: 8639089.
41. Nayak BK, Ghose S, Singh JP. A comparison of cycloplegic and manifest refractions on the NR-1000F (an objective Auto Refractometer). *The British journal of ophthalmology*. 1987; 71(1):73–5. Epub 1987/01/01. PMID: 3814575; PubMed Central PMCID: PMCPMC1041088.
42. Rotsos T, Grigoriou D, Kokkolaki A, Manios N. A comparison of manifest refractions, cycloplegic refractions and retinoscopy on the RMA-3000 autorefractometer in children aged 3 to 15 years. *Clinical ophthalmology (Auckland, NZ)*. 2009; 3:429–31. Epub 2009/08/18. PMID: 19684866; PubMed Central PMCID: PMCPMC2724033.
43. Hashemi H, Khabazkhoob M, Asharilous A, Soroush S, Yekta A, Dadbin N, et al. Cycloplegic autorefraction versus subjective refraction: the Tehran Eye Study. *The British journal of ophthalmology*. 2016; 100(8):1122–7. Epub 2015/11/07. <https://doi.org/10.1136/bjophthalmol-2015-307871> PMID: 26541436.
44. Williams C, Miller L, Northstone K, Sparrow JM. The use of non-cycloplegic autorefraction data in general studies of children's development. *The British journal of ophthalmology*. 2008; 92(5):723–4. Epub 2008/04/29. <https://doi.org/10.1136/bjo.2007.136051> PMID: 18441189.
45. Weissberg E, Suckow M, Thorn F. Minimal angle horizontal strabismus detectable by lay observers. *Optometry and vision science: official publication of the American Academy of Optometry*. 2004; 81(7):505–9. Epub 2004/07/15. PMID: 15252349.
